# Supplementary material for: Elucidating The Burden of Dual-Sensory Impairment in Community-based Older Individuals in a Multi- Ethnic Society
Source: Research Square preprint supplement (doi:10.21203/rs.3.rs-7920823/v1), 2025-11-13
Supplement: Supplementary file 1 [file ae5308ab3ec72e433842b1dd.pdf]

## **Supplementary materials**

### **Supplement 1**

In short, 6377 individuals received study invitation letters after being carefully selected from a national database. Study recruitment officers visited these individuals at home to ascertain eligibility and agreement to participate. Of the 6377 invited, 1015 (15.9%) were classified as ‘uncontactable’ because of invalid address(s), were unresponsive to  $\geq 3$  home visit attempts, and/or living in residences that were inaccessible because of security restrictions. In addition, 648 (10.2%) individuals were excluded because of incarceration, death, residence abroad or in a nursing home; while a further 994 (15.6%) were deemed ineligible because they were terminally ill, bedridden, or otherwise unable to give informed consent due to severe cognitive (assessed using 6 item Cognitive Impairment Test (6-CIT))<sup>79</sup>, hearing impairment or muteness. Of the remaining 3720 (69.4%) eligible individuals, 1055 refused (28.33%), 23 (0.62%) were undecided and a total of 2643 (71.05%) participated in the study. Reasons for refusal were lack of interest (n=895, 84.9%) or time needed to participate in the study (n=159, 15.1%). Compared to participants (n=2,643), non-participants (n=1,054) were older ( $p<0.001$ ), more likely to be female ( $p<0.001$ ), and Chinese ( $p<0.001$ ). About 54.8% of the sample was female, and 49.8%, 25.1%, 25.0% were Chinese, Indians, and Malays, respectively.

## Supplement 2

Additional analysis with different VI and HI definitions. VI = PDVA worse than 20/40 ( $> 0.3$  logMAR) in the worst eye. HI = PTA  $> 25$  dB in the worst ear.

**Figure S1:** Subject flowchart of PIONEER study population for the additional analysis

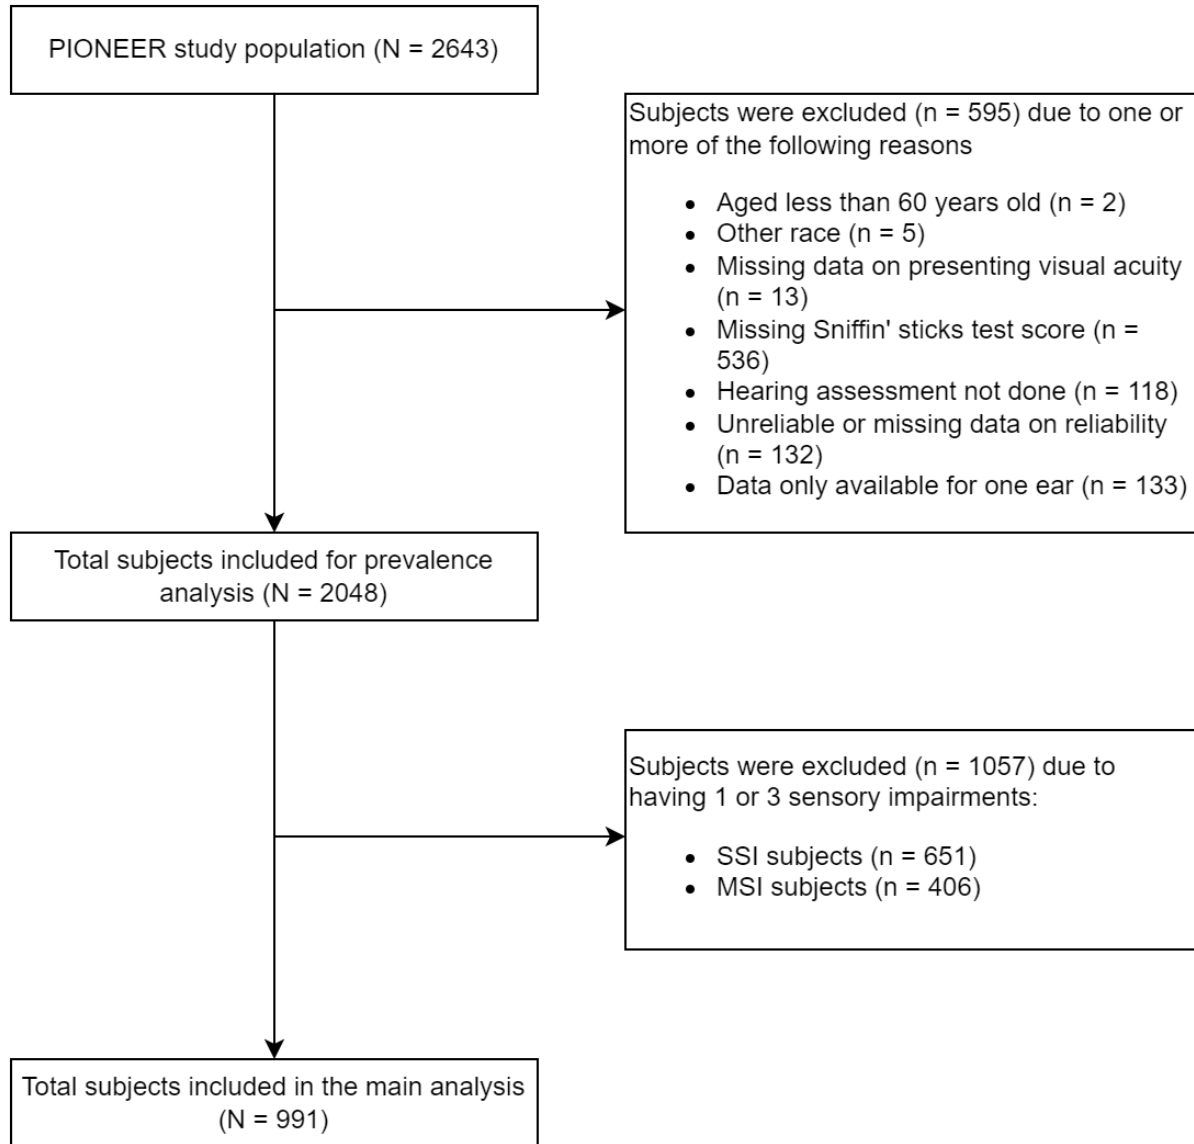

## Supplementary Tables

1. **Table S1.** Demographic, systemic, socioeconomic characteristics and patient reported outcomes of participants in the PIONEER study, stratified by DSI status (NSI, DSI).
2. **Table S2.** Weighted prevalence of DSI, stratified by age, gender and ethnicity in the PIONEER study.
3. **Table S3A.** Factors associated with DSI (VI+HI)
4. **Table S3B.** Factors associated with DSI (OI+HI)
5. **Table S4.** Associations between DSI and patient-reported outcomes.
6. **Table S5.** Associations between DSI and costs using two-parts model.

**Table S1.** Demographic, systemic, socioeconomic characteristics and patient reported outcomes of participants in the PIONEER study, stratified by DSI status (NSI, DSI).

| Characteristics             | NSI (N=137)        | DSI <sup>1</sup> (N=854) | Overall (N=991) |
|-----------------------------|--------------------|--------------------------|-----------------|
|                             | Mean (SD) or n (%) |                          |                 |
| Age (year)                  | 65.7 (4.9)         | 73.6 (7.9)               | 72.5 (8.0)      |
| Female gender               | 94 (68.6)          | 453 (53.0)               | 547 (55.2)      |
| Race                        |                    |                          |                 |
| Chinese                     | 69 (50.4)          | 422 (49.4)               | 491 (49.5)      |
| Malay                       | 32 (23.4)          | 233 (27.3)               | 265 (26.7)      |
| Indian                      | 36 (26.3)          | 199 (23.3)               | 235 (23.7)      |
| Low socioeconomic status    | 8 (5.8)            | 154 (18.0)               | 162 (16.3)      |
| Living alone                | 7 (5.1)            | 90 (10.5)                | 97 (9.8)        |
| BMI categories              |                    |                          |                 |
| Underweight                 | 9 (6.6)            | 44 (5.2)                 | 53 (5.3)        |
| Normal                      | 38 (27.7)          | 228 (26.7)               | 266 (26.8)      |
| Overweight/Obese            | 90 (65.7)          | 580 (67.9)               | 670 (67.6)      |
| Smoking status              |                    |                          |                 |
| Never smoked or past smoker | 129 (94.2)         | 743 (87.0)               | 872 (88.0)      |
| Current smoker              | 7 (5.1)            | 86 (10.1)                | 93 (9.4)        |
| Alcohol frequency           |                    |                          |                 |
| None                        | 109 (79.6)         | 715 (83.7)               | 824 (83.1)      |
| ≤ 4 days/week               | 11 (8.0)           | 67 (7.8)                 | 78 (7.9)        |
| > 4 days/week               | 2 (1.5)            | 22 (2.6)                 | 24 (2.4)        |
| Polypharmacy                | 13 (9.5)           | 195 (22.8)               | 208 (21.0)      |
| Any systemic condition      | 130 (94.9)         | 838 (98.1)               | 968 (97.7)      |
| Systemic conditions         |                    |                          |                 |
| Diabetes                    | 32 (23.4)          | 302 (35.4)               | 334 (33.7)      |
| Hypertension                | 103 (75.2)         | 738 (86.4)               | 841 (84.9)      |
| Dyslipidaemia               | 119 (86.9)         | 692 (81.0)               | 811 (81.8)      |
| CVD                         | 9 (6.6)            | 149 (17.4)               | 158 (15.9)      |
| CKD                         | 3 (2.2)            | 169 (19.8)               | 172 (17.4)      |
| Multimorbidity              | 37 (27.0)          | 357 (41.8)               | 394 (39.8)      |

1. DSI subjects consists of 29 (3.4%) VI+OI subjects, 476 (55.7%) VI+HI subjects, and 349 (40.9%) OI+HI subjects. BMI: Body Mass Index; BP: Blood Pressure; CKD: Chronic Kidney Disease; CVD: Cardiovascular Disease; DSI: Dual Sensory Impairment; HI: Hearing Impairment; NSI: No Sensory Impairment; OI: Olfactory Impairment; SD: Standard Deviation; VI: Visual Impairment

**Table S2.** Weighted prevalence of DSI, stratified by age, gender and ethnicity in the PIONEER study.

| Age group    | All (N = 2048)  |                         | Gender          |                         |                   |                         | Ethnicity         |                         |                 |                         |                  |                         |
|--------------|-----------------|-------------------------|-----------------|-------------------------|-------------------|-------------------------|-------------------|-------------------------|-----------------|-------------------------|------------------|-------------------------|
|              |                 |                         | Male (N = 919)  |                         | Female (N = 1129) |                         | Chinese (N = 992) |                         | Malay (N = 582) |                         | Indian (N = 474) |                         |
|              | n               | Weighted, %<br>(95% CI) | n               | Weighted, %<br>(95% CI) | n                 | Weighted, %<br>(95% CI) | n                 | Weighted, %<br>(95% CI) | n               | Weighted, %<br>(95% CI) | n                | Weighted, %<br>(95% CI) |
| <b>VI+OI</b> |                 |                         |                 |                         |                   |                         |                   |                         |                 |                         |                  |                         |
| 60-69        | 16              | 2.5 (1.3, 4.3)          | 4               | 0.7 (0.1, 2.5)          | 12                | 4.3 (2.1, 7.7)          | 10                | 2.8 (1.4, 5.1)          | 3               | 1.2 (0.2, 3.5)          | 3                | 1.5 (0.3, 4.5)          |
| 70-79        | 8               | 1.5 (0.6, 3.1)          | 3               | 1.2 (0.2, 4.1)          | 5                 | 1.7 (0.5, 4.1)          | 6                 | 1.6 (0.6, 3.5)          | 1               | 0.5 (0.0, 2.9)          | 1                | 0.6 (0.0, 3.5)          |
| ≥ 80         | 5               | 1.1 (0.3, 2.8)          | 3               | 2.1 (0.4, 6.2)          | 2                 | 0.5 (0.0, 2.4)          | 4                 | 1.2 (0.3, 3.2)          | 0               | -                       | 1                | 0.6 (0.0, 3.5)          |
| P-trend      | P-trend = 0.102 |                         | P-trend = 0.940 |                         | P-trend = 0.033   |                         | P-trend = 0.167   |                         | P-trend = 0.171 |                         | P-trend = 0.541  |                         |
| Total        | 29              | 2.0 (1.2, 3.1)          | 10              | 1.0 (0.4, 2.2)          | 19                | 2.9 (1.6, 4.8)          | 20                | 2.2 (1.3, 3.5)          | 4               | 0.9 (0.2, 2.4)          | 5                | 1.2 (0.3, 3.0)          |
| <b>VI+HI</b> |                 |                         |                 |                         |                   |                         |                   |                         |                 |                         |                  |                         |
| 60-69        | 165             | 18.6 (15.4, 22.2)       | 68              | 17.7 (13.2, 22.9)       | 97                | 19.5 (15.0, 24.7)       | 64                | 17.8 (14.0, 22.2)       | 62              | 23.1 (18.1, 28.7)       | 39               | 20.2 (14.7, 26.6)       |
| 70-79        | 178             | 26.0 (22.1, 30.1)       | 60              | 20.0 (14.6, 26.3)       | 118               | 31.2 (25.8, 37.0)       | 98                | 26.3 (21.9, 31.1)       | 44              | 24.6 (18.5, 31.6)       | 36               | 23.7 (17.1, 31.3)       |
| ≥ 80         | 133             | 27.3 (22.2, 32.8)       | 60              | 27.9 (20.9, 35.9)       | 73                | 26.9 (20.0, 34.7)       | 73                | 28.1 (22.3, 34.4)       | 29              | 20.8 (13.9, 29.3)       | 31               | 23.7 (16.4, 32.3)       |
| P-trend      | P-trend = 0.003 |                         | P-trend = 0.090 |                         | P-trend = 0.008   |                         | P-trend = 0.005   |                         | P-trend = 0.800 |                         | P-trend = 0.053  |                         |
| Total        | 476             | 22.0 (19.7, 24.4)       | 188             | 19.5 (16.3, 23.1)       | 288               | 24.1 (21.0, 27.5)       | 235               | 21.8 (19.2, 24.7)       | 135             | 23.2 (19.6, 27.2)       | 106              | 21.5 (17.6, 25.9)       |
| <b>OI+HI</b> |                 |                         |                 |                         |                   |                         |                   |                         |                 |                         |                  |                         |
| 60-69        | 104             | 11.7 (9.2, 14.7)        | 70              | 17.0 (12.7, 22.1)       | 34                | 6.6 (4.0, 10.2)         | 40                | 11.1 (8.1, 14.8)        | 32              | 12.9 (9.0, 17.6)        | 32               | 17.3 (12.1, 23.5)       |
| 70-79        | 134             | 19.6 (16.1, 23.4)       | 72              | 23.5 (17.7, 30.0)       | 62                | 16.2 (12.1, 21.0)       | 70                | 19.6 (15.6, 24.1)       | 32              | 17.7 (12.4, 24.1)       | 32               | 21.7 (15.4, 29.0)       |
| ≥ 80         | 111             | 18.7 (14.8, 23.1)       | 61              | 23.7 (17.6, 30.8)       | 50                | 15.5 (10.6, 21.5)       | 57                | 18.4 (14.0, 23.4)       | 30              | 21.7 (14.6, 30.3)       | 24               | 19.2 (12.6, 27.4)       |
| P-trend      | P-trend <0.001  |                         | P-trend = 0.076 |                         | P-trend <0.001    |                         | P-trend <0.001    |                         | P-trend <0.001  |                         | P-trend = 0.156  |                         |
| Total        | 349             | 15.0 (13.1, 17.0)       | 203             | 19.6 (16.4, 23.2)       | 146               | 10.8 (8.7, 13.2)        | 167               | 14.7 (12.5, 17.1)       | 94              | 15.0 (12.0, 18.4)       | 88               | 18.6 (14.9, 22.9)       |

Weighted prevalences are calculated with sampling weights specific to each age group, gender and ethnicity to adjust for oversampling and post-stratification weights to align to the population distribution based on the 2020 Singapore Census. P-trend will not be computed for counts less than 5 in any age group or if the total count is less than 20.

CI: Confidence Interval; DSI: Dual Sensory Impairment; HI: Hearing Impairment; OI: Olfactory Impairment; VI: Visual Impairment

**Table S3A.** Factors associated with DSI (VI+HI)

| Risk factor              | Model              |         | Dominance analysis               |                   |
|--------------------------|--------------------|---------|----------------------------------|-------------------|
|                          | OR (95% CI)        | P-value | Contribution <sup>1</sup><br>(%) | Rank <sup>2</sup> |
| Age (year)               | 1.18 (1.13, 1.25)  | <0.001  | 65.9                             | 1                 |
| Gender                   |                    |         | 1.0                              | 9                 |
| Female                   | Reference          | NA      |                                  |                   |
| Male                     | 0.90 (0.50, 1.65)  | 0.74    |                                  |                   |
| Race                     |                    |         | 1.4                              | 7                 |
| Chinese                  | Reference          | NA      |                                  |                   |
| Malay                    | 1.55 (0.78, 3.11)  | 0.209   |                                  |                   |
| Indian                   | 1.27 (0.64, 2.54)  | 0.495   |                                  |                   |
| Low socioeconomic status |                    |         | 14.6                             | 2                 |
| No                       | Reference          | NA      |                                  |                   |
| Yes                      | 2.33 (1.01, 6.08)  | 0.061   |                                  |                   |
| Living alone             |                    |         | 1.7                              | 6                 |
| No                       | Reference          | NA      |                                  |                   |
| Yes                      | 1.66 (0.63, 4.87)  | 0.329   |                                  |                   |
| BMI categories           |                    |         | 1.0                              | 8                 |
| Normal                   | Reference          | NA      |                                  |                   |
| Underweight              | 0.41 (0.12, 1.32)  | 0.133   |                                  |                   |
| Overweight/Obese         | 0.81 (0.42, 1.54)  | 0.534   |                                  |                   |
| Smoking status           |                    |         | 3.0                              | 5                 |
| Never or past smoker     | Reference          | NA      |                                  |                   |
| Current smoker           | 3.25 (1.14, 10.91) | 0.038   |                                  |                   |
| Alcohol frequency        |                    |         | 0.0                              | 10                |
| None                     | Reference          | NA      |                                  |                   |
| ≤ 4 days/week            | 0.98 (0.41, 2.46)  | 0.963   |                                  |                   |
| > 4 days/week            | 2.19 (0.45, 16.59) | 0.375   |                                  |                   |
| Polypharmacy             |                    |         | 3.8                              | 4                 |
| No                       | Reference          | NA      |                                  |                   |
| Yes                      | 1.55 (0.69, 3.68)  | 0.302   |                                  |                   |
| Multimorbidity           |                    |         | 7.6                              | 3                 |
| No                       | Reference          | NA      |                                  |                   |
| Yes                      | 1.64 (0.88, 3.10)  | 0.126   |                                  |                   |

1: Contribution is the standardized dominance statistics in the dominance analysis from the model.

2. The ranks of each predictor are ranked from predictors with the greatest contribution to the least. Low Socioeconomic Status: Having primary or lower education and individual monthly income < SGD2000; BMI categories: BMI < 18.5 kg/m<sup>2</sup> as underweight, BMI between 18.5 and 22.9 kg/m<sup>2</sup> (inclusive) as normal, BMI ≥ 23 kg/m<sup>2</sup> as overweight/obese; Polypharmacy: Taking ≥ 5 medications (exclude supplements or vitamins); Multimorbidity: Having more than or equal to 3 systemic conditions (diabetes, hypertension, dyslipidemia, CVD, CKD)

BMI: Body Mass Index; CI: Confidence Interval; CKD: Chronic Kidney Disease; CVD: Cardiovascular Disease; DSI: Dual Sensory Impairment; HI: Hearing Impairment; OR: Odds Ratio; VI: Visual Impairment

**Table S3B.** Factors associated with DSI (OI+HI)

| Risk factor              | Model             |         | Dominance analysis               |                   |
|--------------------------|-------------------|---------|----------------------------------|-------------------|
|                          | OR (95% CI)       | P-value | Contribution <sup>1</sup><br>(%) | Rank <sup>2</sup> |
| Age (year)               | 1.22 (1.15, 1.30) | <0.001  | 70.9                             | 1                 |
| Gender                   |                   |         | 13.3                             | 2                 |
| Female                   | Reference         | NA      |                                  |                   |
| Male                     | 2.74 (1.47, 5.21) | 0.002   |                                  |                   |
| Race                     |                   |         | 0.4                              | 9                 |
| Chinese                  | Reference         | NA      |                                  |                   |
| Malay                    | 1.19 (0.57, 2.52) | 0.647   |                                  |                   |
| Indian                   | 1.11 (0.53, 2.31) | 0.786   |                                  |                   |
| Low socioeconomic status |                   |         | 0.4                              | 10                |
| No                       | Reference         | NA      |                                  |                   |
| Yes                      | 1.22 (0.43, 3.72) | 0.712   |                                  |                   |
| Living alone             |                   |         | 1.5                              | 7                 |
| No                       | Reference         | NA      |                                  |                   |
| Yes                      | 1.39 (0.48, 4.49) | 0.557   |                                  |                   |
| BMI categories           |                   |         | 0.9                              | 8                 |
| Normal                   | Reference         | NA      |                                  |                   |
| Underweight              | 0.44 (0.12, 1.57) | 0.207   |                                  |                   |
| Overweight/Obese         | 0.83 (0.40, 1.69) | 0.607   |                                  |                   |
| Smoking status           |                   |         | 3.5                              | 4                 |
| Never or past smoker     | Reference         | NA      |                                  |                   |
| Current smoker           | 2.83 (0.97, 9.67) | 0.072   |                                  |                   |
| Alcohol frequency        |                   |         | 1.6                              | 6                 |
| None                     | Reference         | NA      |                                  |                   |
| ≤ 4 days/week            | 0.71 (0.28, 1.83) | 0.466   |                                  |                   |
| > 4 days/week            | 1.12 (0.21, 8.97) | 0.902   |                                  |                   |
| Polypharmacy             |                   |         | 4.3                              | 3                 |
| No                       | Reference         | NA      |                                  |                   |
| Yes                      | 1.79 (0.75, 4.50) | 0.200   |                                  |                   |
| Multimorbidity           |                   |         | 3.2                              | 5                 |
| No                       | Reference         | NA      |                                  |                   |
| Yes                      | 1.07 (0.52, 2.19) | 0.853   |                                  |                   |

1: Contribution is the standardized dominance statistics in the dominance analysis from the model.

2. The ranks of each predictor are ranked from predictors with the greatest contribution to the least.

Low Socioeconomic Status: Having primary or lower education and individual monthly income < SGD2000; BMI categories: BMI < 18.5 kg/m<sup>2</sup> as underweight, BMI between 18.5 and 22.9 kg/m<sup>2</sup> (inclusive) as normal, BMI ≥ 23 kg/m<sup>2</sup> as overweight/obese; Polypharmacy: Taking ≥ 5 medications (exclude supplements or vitamins); Multimorbidity: Having more than or equal to 3 systemic conditions (diabetes, hypertension, dyslipidemia, CVD, CKD)

BMI: Body Mass Index; CI: Confidence Interval; CKD: Chronic Kidney Disease; CVD: Cardiovascular Disease; DSI: Dual Sensory Impairment; HI: Hearing Impairment; OI: Olfactory Impairment; OR: Odds Ratio

**Table S4.** Associations between DSI and patient-reported outcomes.

| PRO                 | Exposure | Estimate <sup>1</sup> (95% CI) | P-value | Overall marginal effect (95% CI) | Change (%) |
|---------------------|----------|--------------------------------|---------|----------------------------------|------------|
| EQ-5D-5L            |          |                                |         |                                  |            |
|                     | NSI      | Reference                      | NA      | NA                               | NA         |
|                     | VI+OI    | 0.014 (-0.033, 0.061)          | 0.560   | 0.014 (-0.033, 0.061)            | 1.53       |
|                     | VI+HI    | -0.021 (-0.045, 0.003)         | 0.091   | -0.021 (-0.045, 0.003)           | -2.26      |
|                     | OI+HI    | 0.002 (-0.023, 0.027)          | 0.864   | 0.002 (-0.023, 0.027)            | 0.24       |
| Life space mobility |          |                                |         |                                  |            |
|                     | NSI      | Reference                      | NA      | NA                               | NA         |
|                     | VI+OI    | -0.064 (-0.431, 0.303)         | 0.732   | -0.064 (-0.430, 0.302)           | -1.38      |
|                     | VI+HI    | -0.132 (-0.319, 0.054)         | 0.164   | -0.132 (-0.318, 0.054)           | -2.86      |
|                     | OI+HI    | -0.137 (-0.333, 0.059)         | 0.171   | -0.137 (-0.333, 0.059)           | -2.96      |
| Low IADL status     |          |                                |         |                                  |            |
|                     | NSI      | Reference                      | NA      | NA                               | NA         |
|                     | VI+OI    | OR: 1.590 (0.294, 6.731)       | 0.552   | 0.053 (-0.132, 0.238)            | 46.91      |
|                     | VI+HI    | OR: 1.811 (0.838, 4.282)       | 0.15    | 0.070 (-0.017, 0.157)            | 62.67      |
|                     | OI+HI    | OR: 1.450 (0.645, 3.532)       | 0.387   | 0.041 (-0.048, 0.131)            | 36.46      |
| Falls               |          |                                |         |                                  |            |
|                     | NSI      | Reference                      | NA      | NA                               | NA         |
|                     | VI+OI    | OR: 0.638 (0.170, 1.932)       | 0.458   | -0.072 (-0.246, 0.103)           | -28.37     |
|                     | VI+HI    | OR: 0.584 (0.325, 1.061)       | 0.074   | -0.084 (-0.182, 0.014)           | -33.17     |
|                     | OI+HI    | OR: 0.771 (0.422, 1.426)       | 0.402   | -0.044 (-0.148, 0.061)           | -17.13     |
| Hospitalisations    |          |                                |         |                                  |            |
|                     | NSI      | Reference                      | NA      | NA                               | NA         |
|                     | VI+OI    | OR: 0.910 (0.043, 7.115)       | 0.936   | -0.005 (-0.116, 0.106)           | -8.58      |
|                     | VI+HI    | OR: 1.645 (0.575, 5.941)       | 0.392   | 0.031 (-0.032, 0.094)            | 59.09      |
|                     | OI+HI    | OR: 1.333 (0.447, 4.939)       | 0.631   | 0.017 (-0.046, 0.079)            | 31.04      |
| Osteoporosis        |          |                                |         |                                  |            |
|                     | NSI      | Reference                      | NA      | NA                               | NA         |
|                     | VI+OI    | OR: 0.112 (0.006, 0.600)       | 0.039   | -0.239 (-0.367, -0.111)          | -83.44     |
|                     | VI+HI    | OR: 1.274 (0.737, 2.246)       | 0.394   | 0.047 (-0.060, 0.154)            | 15.90      |



|            |       |                          |       |                        |        |
|------------|-------|--------------------------|-------|------------------------|--------|
| Frailty    | OI+HI | OR: 0.735 (0.406, 1.346) | 0.312 | -0.055 (-0.162, 0.053) | -18.75 |
|            | NSI   | Reference                | NA    | NA                     | NA     |
|            | VI+OI | OR: 0.623 (0.030, 4.386) | 0.683 | -0.033 (-0.174, 0.108) | -34.29 |
|            | VI+HI | OR: 1.535 (0.626, 4.356) | 0.379 | 0.040 (-0.042, 0.122)  | 42.90  |
|            | OI+HI | OR: 0.947 (0.366, 2.782) | 0.916 | -0.004 (-0.085, 0.076) | -4.56  |
| Sarcopenia | NSI   | Reference                | NA    | NA                     | NA     |
|            | VI+OI | OR: 1.290 (0.476, 3.405) | 0.608 | 0.055 (-0.157, 0.266)  | 14.95  |
|            | VI+HI | OR: 1.164 (0.702, 1.950) | 0.559 | 0.033 (-0.077, 0.142)  | 8.88   |
|            | OI+HI | OR: 1.255 (0.742, 2.141) | 0.400 | 0.049 (-0.065, 0.163)  | 13.32  |

1. For PROs EQ-5D-5L, and life space mobility, the estimates are coefficients derived from linear regression models. The remaining PROs are odds ratios (OR) derived from logistic regression models.

All models are adjusted for age, gender, ethnicity, low socioeconomic status, living alone, smoking status, polypharmacy and multimorbidity.

CI: Confidence Interval; DSI: Dual Sensory Impairment; EQ-5D-5L: EuroQoL 5-dimension 5-level; HI: Hearing Impairment; IADL: Instrumental Activities of Daily Living; NSI: No sensory impairment; OI: Olfactory Impairment; OR: Odds Ratio; PRO: Patient-Reported Outcome; VI: Visual Impairment

**Table S5.** Associations between DSI and costs using two-parts model.

| Outcome         | Exposure | First part        |         | Second part         |         | Overall marginal effect<br>(95% CI) |
|-----------------|----------|-------------------|---------|---------------------|---------|-------------------------------------|
|                 |          | OR (95% CI)       | P-value | Cost Ratio (95% CI) | P-value |                                     |
| Healthcare cost | Robust   | Reference         | NA      | Reference           | NA      | NA                                  |
|                 | VI+OI    | 0.83 (0.31, 2.11) | 0.701   | 1.77 (0.41, 12.63)  | 0.473   | 138.51 (-433.94, 710.96)            |
|                 | VI+HI    | 0.57 (0.35, 0.93) | 0.024   | 2.49 (1.07, 5.51)   | 0.031   | 184.36 (-81.54, 450.25)             |
|                 | OI+HI    | 0.51 (0.31, 0.86) | 0.011   | 3.55 (1.43, 8.34)   | 0.003   | 322.87 (-22.25, 668.00)             |

In the two-parts model, the first part results were odds ratios from logistic regression models and the second part results were cost ratios (exponentiated coefficients) from gamma generalised linear models with a log-link function for healthcare cost.

All models are adjusted for age, gender, ethnicity, low socioeconomic status, living alone, smoking status, polypharmacy and multimorbidity.

CI: Confidence Interval; DSI: Dual Sensory Impairment; HI: Hearing Impairment; NSI: No Sensory Impairment; OI: Olfactory Impairment; OR: Odds Ratio;

PRO: Patient-Reported Outcome; VI: Visual Impairment
